# Supplementary material for: Secondary organic aerosol formation from photochemical aging of light-duty gasoline vehicle exhausts in a smog chamber
Source: Copernicus journal article supplement (doi:10.5194/acp-15-9049-2015), 2015-08-14
Supplement: Supplementary file 1 [file acp-15-9049-2015-supplement.pdf]

Supplement of Atmos. Chem. Phys., 15, 9049–9062, 2015  
<http://www.atmos-chem-phys.net/15/9049/2015/>  
doi:10.5194/acp-15-9049-2015-supplement  
© Author(s) 2015. CC Attribution 3.0 License.

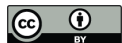

*Supplement of*

## **Secondary organic aerosol formation from photochemical aging of light-duty gasoline vehicle exhausts in a smog chamber**

**T. Liu et al.**

*Correspondence to:* X. Wang (wangxm@gig.ac.cn)

The copyright of individual parts of the supplement might differ from the CC-BY 3.0 licence.

**Table S1.** The initial number and surface concentrations of particles at  $t = 0$  h (since lights on) in each experiment.

| Experiment # | Number ( $\text{cm}^{-3}$ ) | Surface ( $\mu\text{m}^2 \text{cm}^{-3}$ ) |
|--------------|-----------------------------|--------------------------------------------|
| 1            | 114                         | 2.23                                       |
| 2            | 82                          | 2.9                                        |
| 3            | 332                         | 4.7                                        |
| 4            | 337                         | 4.2                                        |
| 5            | 18948                       | 25.8                                       |

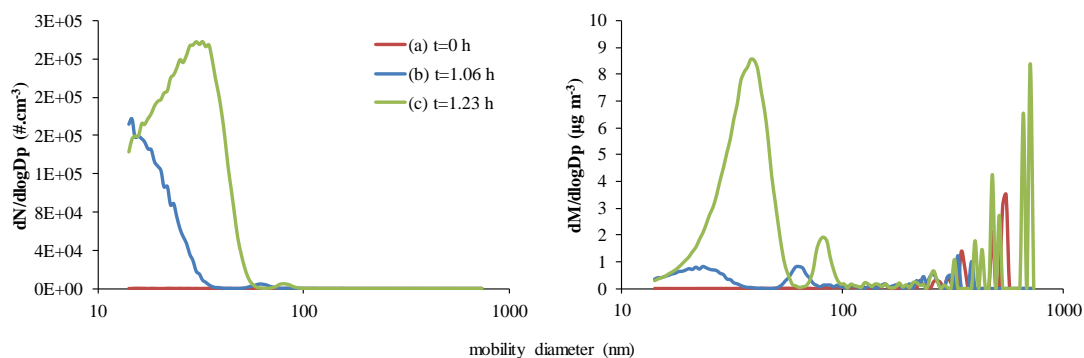

**Fig. S1.** Particle number (left) and mass (right) distributions for a typical smog chamber experiment (experiment 2). (a) just before black lamps were turned on, (b) at the beginning of a nucleation event about 1 h after black lamps were turned on, (c) 10 min after the nucleation.

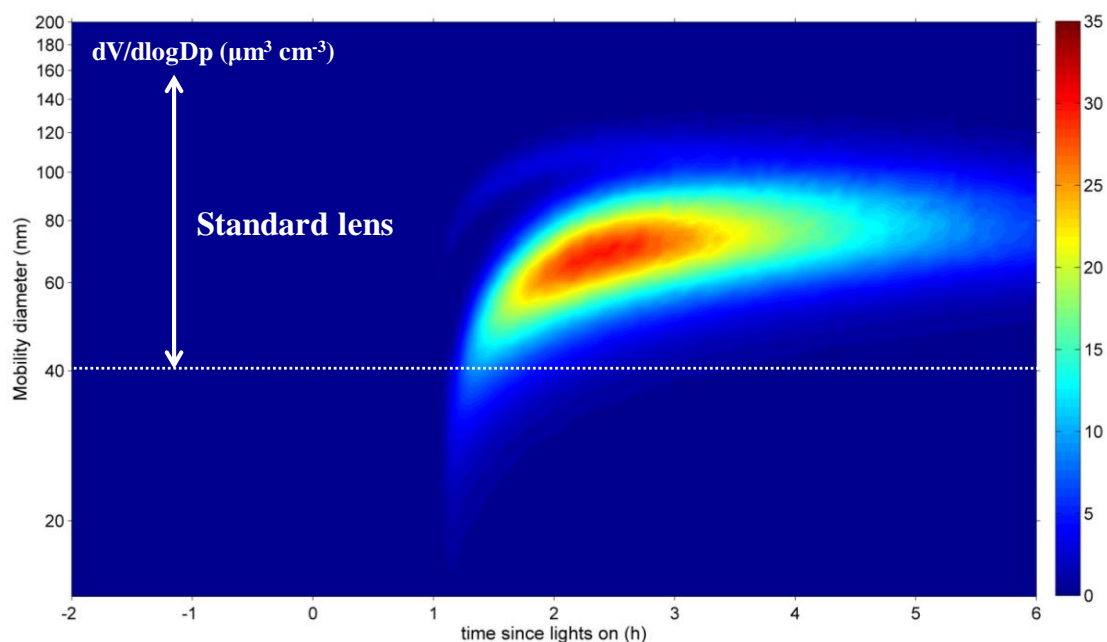

**Fig. S2.** Particle volume distribution measured by SMPS for a typical smog chamber experiment (experiment 2).

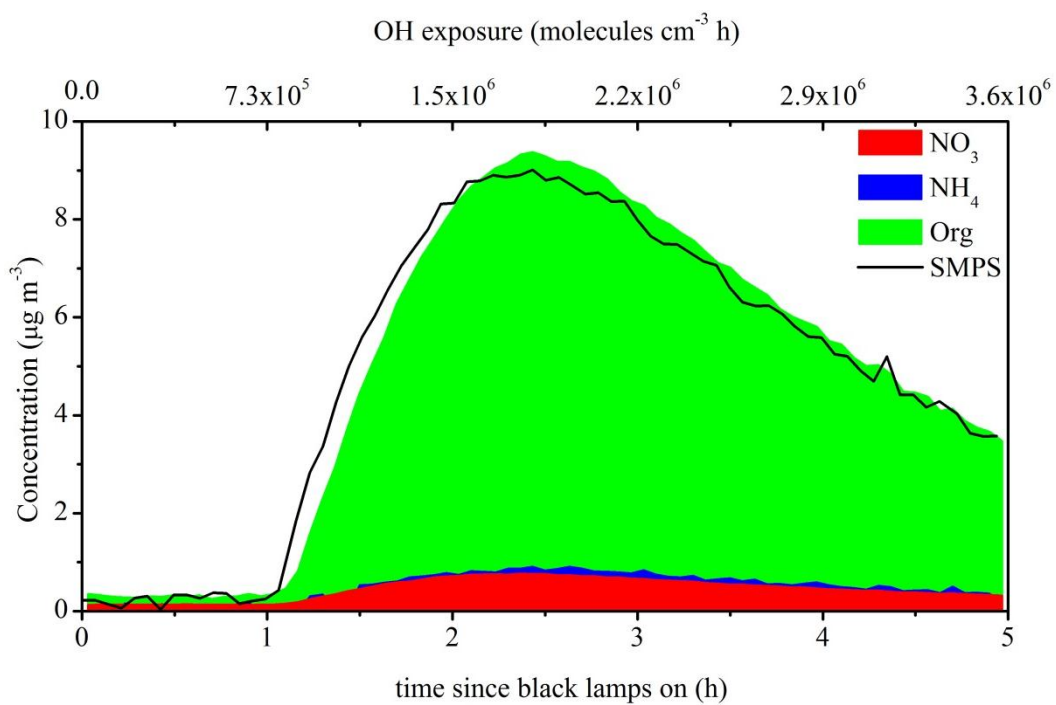

**Fig. S3.** Comparison of the sum of organics, nitrate and ammonium (measured by AMS) against the total particle mass measured by the SMPS for experiment 2. Data are not wall-loss corrected.

**Table S2.** The predicted SOA production from each aromatic hydrocarbon (measured by GC-MSD) in all experiments.

|            |                         | Experiment                             |      |      |       |     |
|------------|-------------------------|----------------------------------------|------|------|-------|-----|
|            |                         | 1                                      | 2    | 3    | 4     | 5   |
| Species    |                         | Predicted SOA ( $\mu\text{g m}^{-3}$ ) |      |      |       |     |
|            | benzene                 | 1.6                                    | 0.1  | 1.5  | 1.9   | 0.0 |
|            | toluene                 | 7.7                                    | 0.5  | 7.3  | 7.6   | 0.2 |
| C2-benzene | ethyl-benzene           | 1.3                                    | 0.4  | 0.5  | 3.0   | 0.0 |
|            | m-, p-xylene            | 2.9                                    | 1.7  | 2.8  | 7.6   | 0.2 |
|            | styrene                 | 1.0                                    | 0.3  | 2.8  | 2.2   | 0.0 |
|            | o-xylene                | 0.9                                    | 0.7  | 1.1  | 2.9   | 0.0 |
| C3-benzene | isopropylbenzene        | 0.1                                    | 0.1  | 0.1  | 0.2   | 0.0 |
|            | n-propylbenzene         | 0.2                                    | 0.3  | 0.0  | 0.6   | 0.0 |
|            | m-ethyltoluene          | 1.4                                    | 1.6  | 3.1  | 7.4   | 0.2 |
|            | p-ethyltoluene          | 0.3                                    | 1.1  | 0.5  | 1.9   | 0.0 |
|            | 1,3,5-trimethyl-benzene | 0.8                                    | 1.2  | 3.4  | 3.0   | 0.1 |
|            | o-ethyltoluene          | 0.5                                    | 0.8  | 0.6  | 2.5   | 0.0 |
|            | 1,2,4-trimethylbenzene  | 2.1                                    | 2.6  | 9.7  | 10.2  | 0.3 |
|            | 1,2,3-trimethylbenzene  | 0.6                                    | 0.9  | 3.9  | 2.4   | 0.1 |
| C4-benzene | m-diethylbenzene        | 0.1                                    | 0.4  | 0.2  | 0.2   | 0.0 |
|            | p-diethylbenzene        | 0.1                                    | 0.6  | 0.0  | 0.7   | 0.1 |
|            | o-diethylbenzene        | 0.0                                    | 0.0  | 0.0  | 0.1   | 0.0 |
|            | naphthalene             | 20.7                                   | 2.7  | 8.0  | 9.7   | 2.1 |
|            | total predicted SOA     | 42.2                                   | 15.9 | 45.5 | 63.9  | 3.4 |
|            | total measured SOA      | 51.1                                   | 17.6 | 77.6 | 125.4 | 4.0 |
